# Supplementary material for: Self-healing electronic skin with high fracture strength and toughness
Source: PubMed Central journal article supplement — Nat Commun. 2024 Nov 11;15:9763. doi: 10.1038/s41467-024-53957-0 (PMC11554781; doi:10.1038/s41467-024-53957-0), 2024-11-11
Supplement: 41467_2024_53957_MOESM1_ESM.pdf [file 41467_2024_53957_MOESM1_ESM.pdf]

## Supplementary information

# Self-healing electronic skin with high fracture strength and toughness

Jaehoon Jung,<sup>1</sup> Sunwoo Lee,<sup>1</sup> Hyunjun Kim,<sup>2</sup> Wonbeom Lee,<sup>1</sup> Jooyeun Chong,<sup>1</sup> Insang  
You,<sup>3\*</sup> and Jiheong Kang<sup>2\*</sup>

<sup>1</sup> Department of Materials Science and Engineering, Korea Advanced Institute of Science and  
Technology (KAIST), Daejeon, 34141 Republic of Korea

<sup>2</sup> Department of Chemistry, Seoul National University, Seoul, 08826 Republic of Korea

<sup>3</sup> Department of Chemistry, University of Waterloo, 200 University Ave W., Waterloo, Ontario  
N3L3G1, Canada

\*To whom correspondence should be addressed:

E-mail: [jiheongkang@snu.ac.kr](mailto:jiheongkang@snu.ac.kr) (J. K.) [iyou@uwaterloo.ca](mailto:iyou@uwaterloo.ca) (I.Y.)



**Table of contents:**

- Supplementary Figure 1.** Synthetic route to SHPs with different ratio of UPy and aromatic disulfide. SHP-1:  $n = 0.6$ , SHP-2:  $n = 0.8$
- Supplementary Figure 2.** Synthetic route to SHP-3.
- Supplementary Figure 3.**  $^1\text{H}$  NMR spectrums of SHPs in DMSO (400 MHz).
- Supplementary Figure 4.** GPC profiles of SHPs.
- Supplementary Figure 5.** Synthesis of UPy.
- Supplementary Figure 6.** Comparison of polymer and ionic conductor in S-S curve.
- Supplementary Figure 7.** Master curves of Self-healing materials.
- Supplementary Figure 8.** DSC data of self-healing materials.
- Supplementary Figure 9.** Fracture tests of self-healing materials.
- Supplementary Figure 10.** Stress-strain curves of self-healing materials.
- Supplementary Figure 11.** Cyclic tests of self-healing materials.
- Supplementary Figure 12.** Nyquist plot for SHIC-1 as a function of the amount of ionic liquid and the stress-strain curve (S-S curve) for SHIC-1 with 30 wt% EMIMTFSI.
- Supplementary Figure 13.** Self-healing tests of materials.
- Supplementary Figure 14.** Self-healing tests of SHIC-1.
- Supplementary Figure 15.** Self-healing stretchable multimodal sensor and electrodes.
- Supplementary Figure 16.** SEM image of self-healing artificial multimodal sensor.
- Supplementary Figure 17.** A comparison between self-healing artificial multimodal sensors with different active layers.
- Supplementary Figure 18.** Comparison of the temperature sensitivity of the multimodal sensor based on the amount of EMIMTFSI in the SHIC-1 active layer.
- Supplementary Figure 19.** Charge relaxation frequency behavior under different temperatures.
- Supplementary Figure 20.** Strain-insensitive temperature sensing under various temperature and strain.
- Supplementary Figure 21.** Charge relaxation frequency and capacitance behavior under stretching.
- Supplementary Figure 22.** Temperature-insensitive strain sensing under various temperatures and strains.
- Supplementary Figure 23.** Comparison of bode plots between pristine multimodal sensor and self-healed multimodal sensor.
- Supplementary Figure 24.** Difference in self-healing speed between the self-healing multimodal sensor and the self-healing damage sensor.
- Supplementary Figure 25.** Changes of resistance of flexion sensor as a function of strain.
- Supplementary Figure 26.** Cyclic test of the flexion sensor.
- Supplementary Figure 27.** The configuration of soft grippers.
- Supplementary Figure 28.** Actuation ability of the self-healing gripper.
- Supplementary Figure 29.** Bending soft pneumatic actuator for soft gripper applications.
- Supplementary Figure 30.** Self-healing stretchable flexion sensor and damage sensor.
- Supplementary Figure 31.** Sensory systems of the soft robot.
- Supplementary Figure 32.** Difference in resistance change of the self-healing damage sensor when grabbing an object versus when damage is inflicted.
- Supplementary Table 1.** Comparison of the ionic conductivity and mechanical toughness of ionic conductors mentioned in the references.

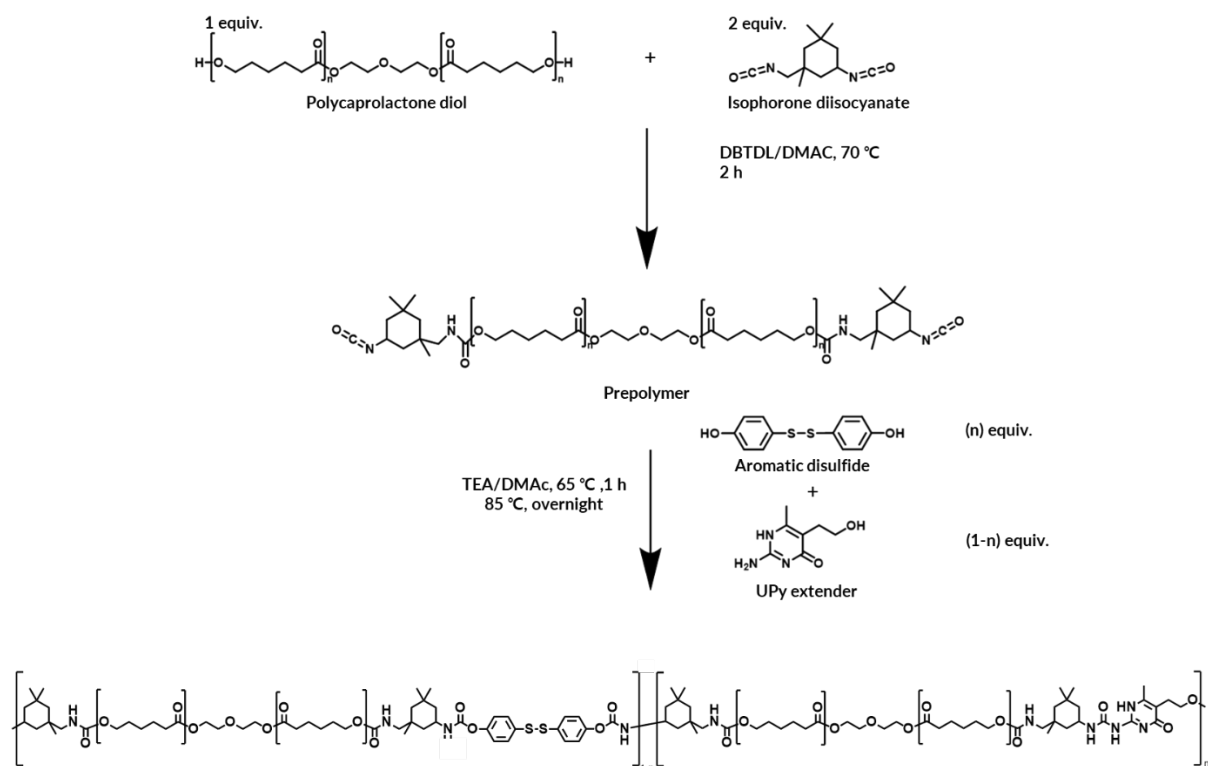

**Supplementary Figure 1. Synthetic route to SHPs with different ratio of UPy and aromatic disulfide. SHP-1:  $n = 0.6$ , SHP-2:  $n = 0.8$**

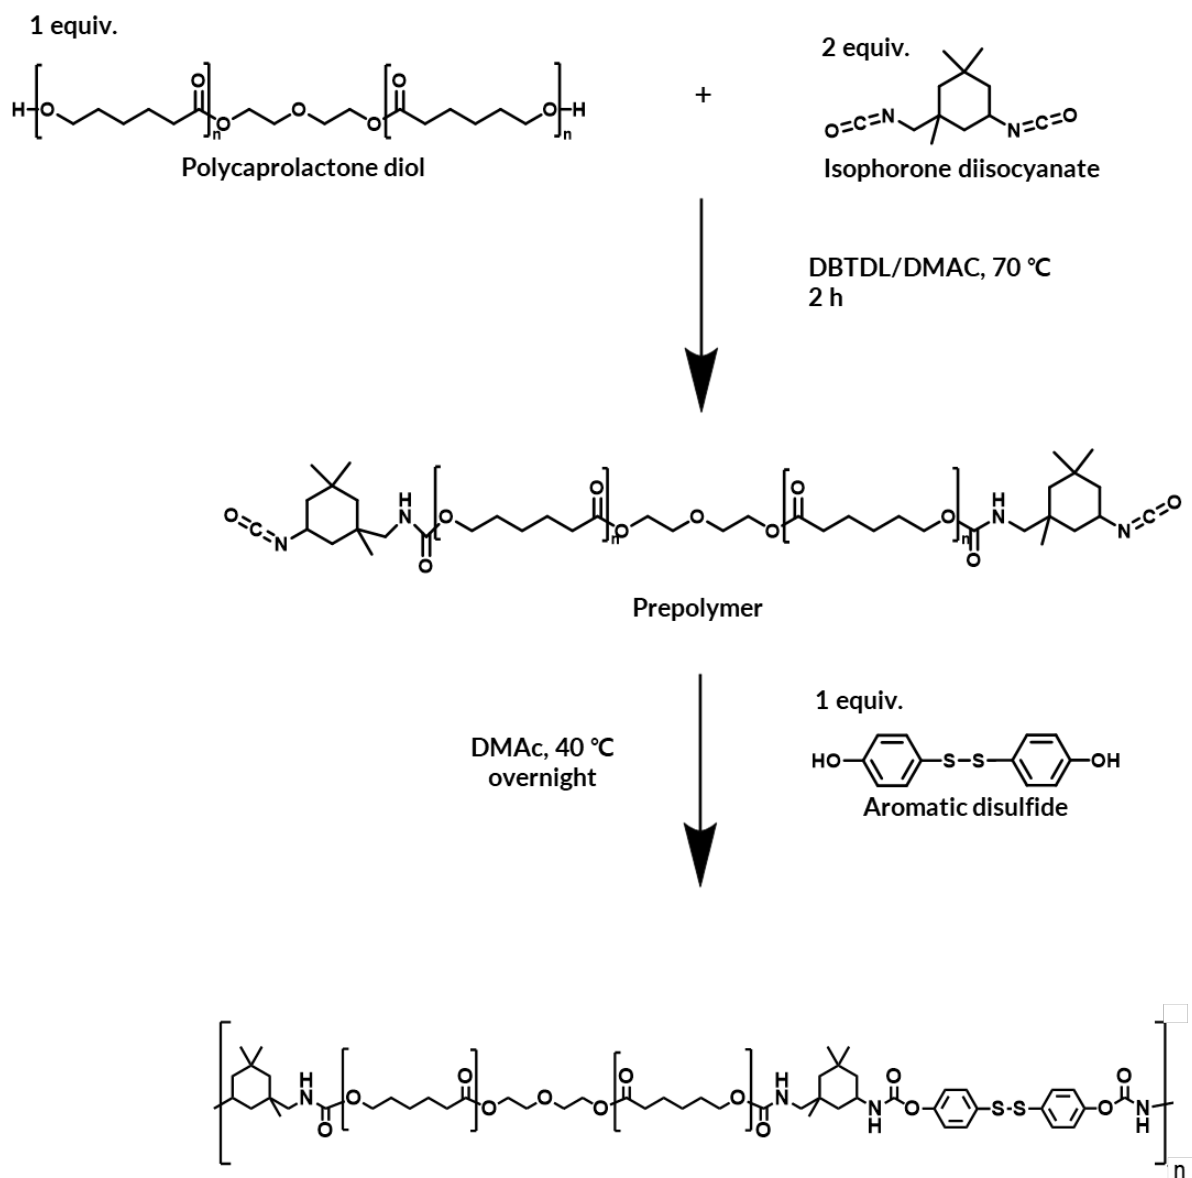

Supplementary Figure 2. Synthetic route to SHP-3.

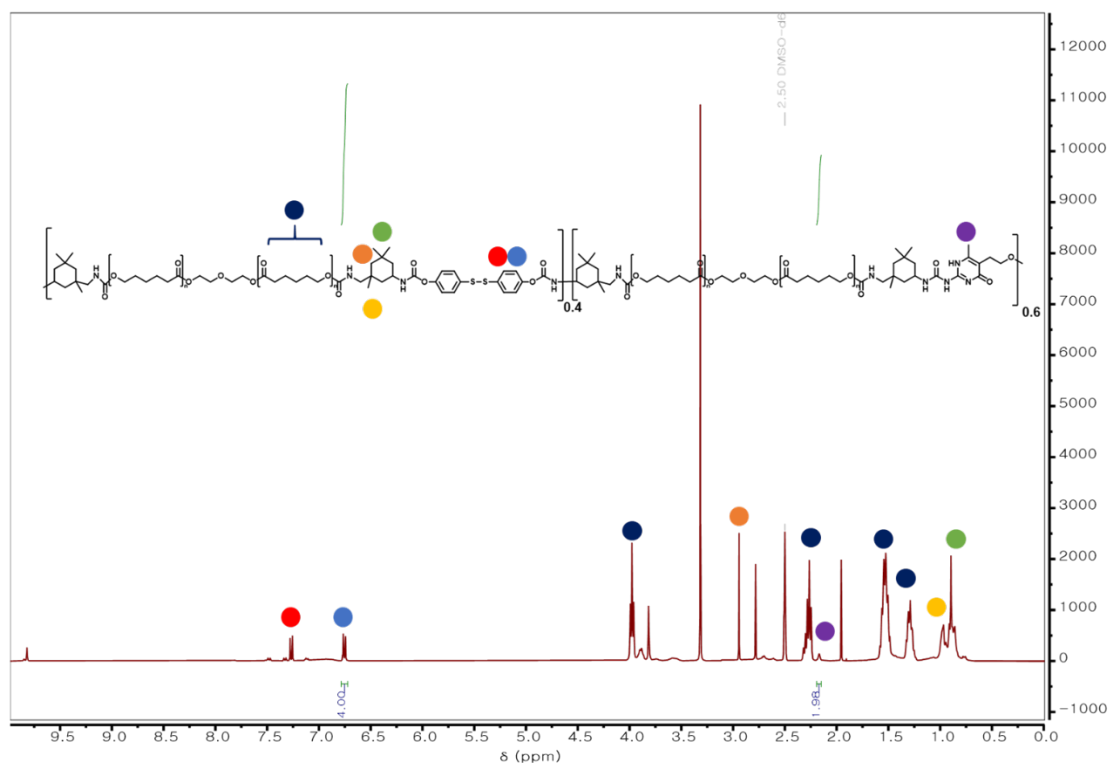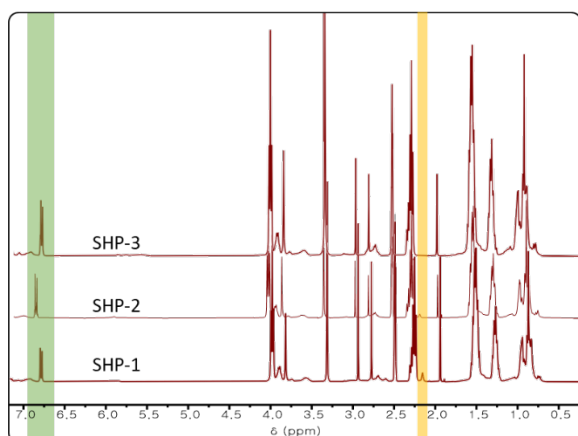

| Polymer | # of Disulfide unit / # of UPy unit |              |
|---------|-------------------------------------|--------------|
|         | Theoretical                         | Experimental |
| SHP-1   | 1.500                               | 1.515        |
| SHP-2   | 4.000                               | 3.947        |
| SHP-3   | N.A.                                | N.A.         |

**Supplementary Figure 3.  $^1\text{H}$  NMR spectra of SHPs in DMSO (400 MHz).**

In the  $^1\text{H}$  NMR spectra of SHPs, the peaks of disulfide aromatic unit appeared at 7.4~7.0 and 7.0~6.5 ppm. The peaks of protons adjacent to ester C-O in polycaprolactone appeared at 4.0 ppm, and those adjacent to ester C=O appeared at 2.3-2.2 ppm, respectively, indicating that soft segment is composed of polycaprolactone diol. Methylene protons appeared at 1.7~1.3 ppm and methyl (-CH<sub>3</sub>) protons of isophorone diisocyanate appeared at 1.0~0.8 ppm, proton of urethane unit appeared at 3.0~2.8 ppm, and methyl protons adjacent to urethane unit appeared at 0.9~1.0 ppm suggesting that hard segment is composed of isophorone diisocyanate. Finally, methyl of UPy protons appeared at 2.2~2.0 ppm, and N-H proton of Upy appeared at 10.0~9.5 ppm. The ratio of disulfide unit and UPy in  $^1\text{H}$  NMR corresponds to the ideal ratio of those.

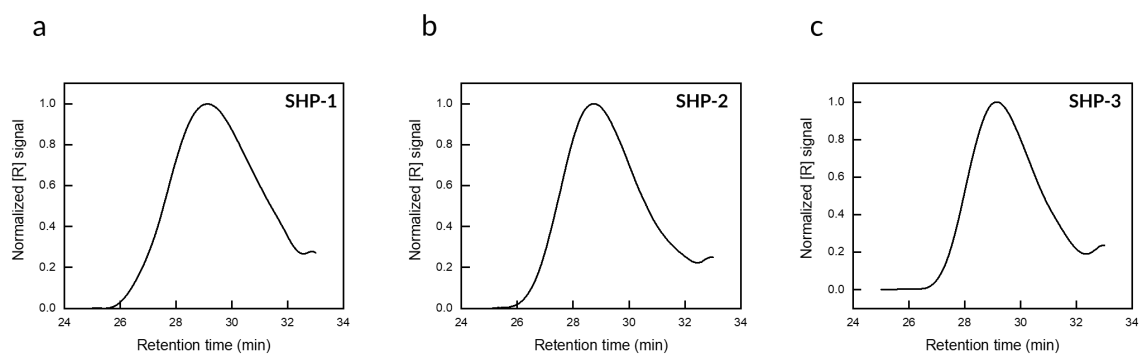

**Supplementary Figure 4. GPC profiles of SHPs.**

**a**, SHP-1. ( $M_n=14190$  g/mol,  $M_w=52380$  g/mol) **b**, SHP-2. ( $M_n=15150$  g/mol,  $M_w=39530$  g/mol) **c**, SHP-3. ( $M_n=12170$  g/mol,  $M_w=25430$  g/mol)

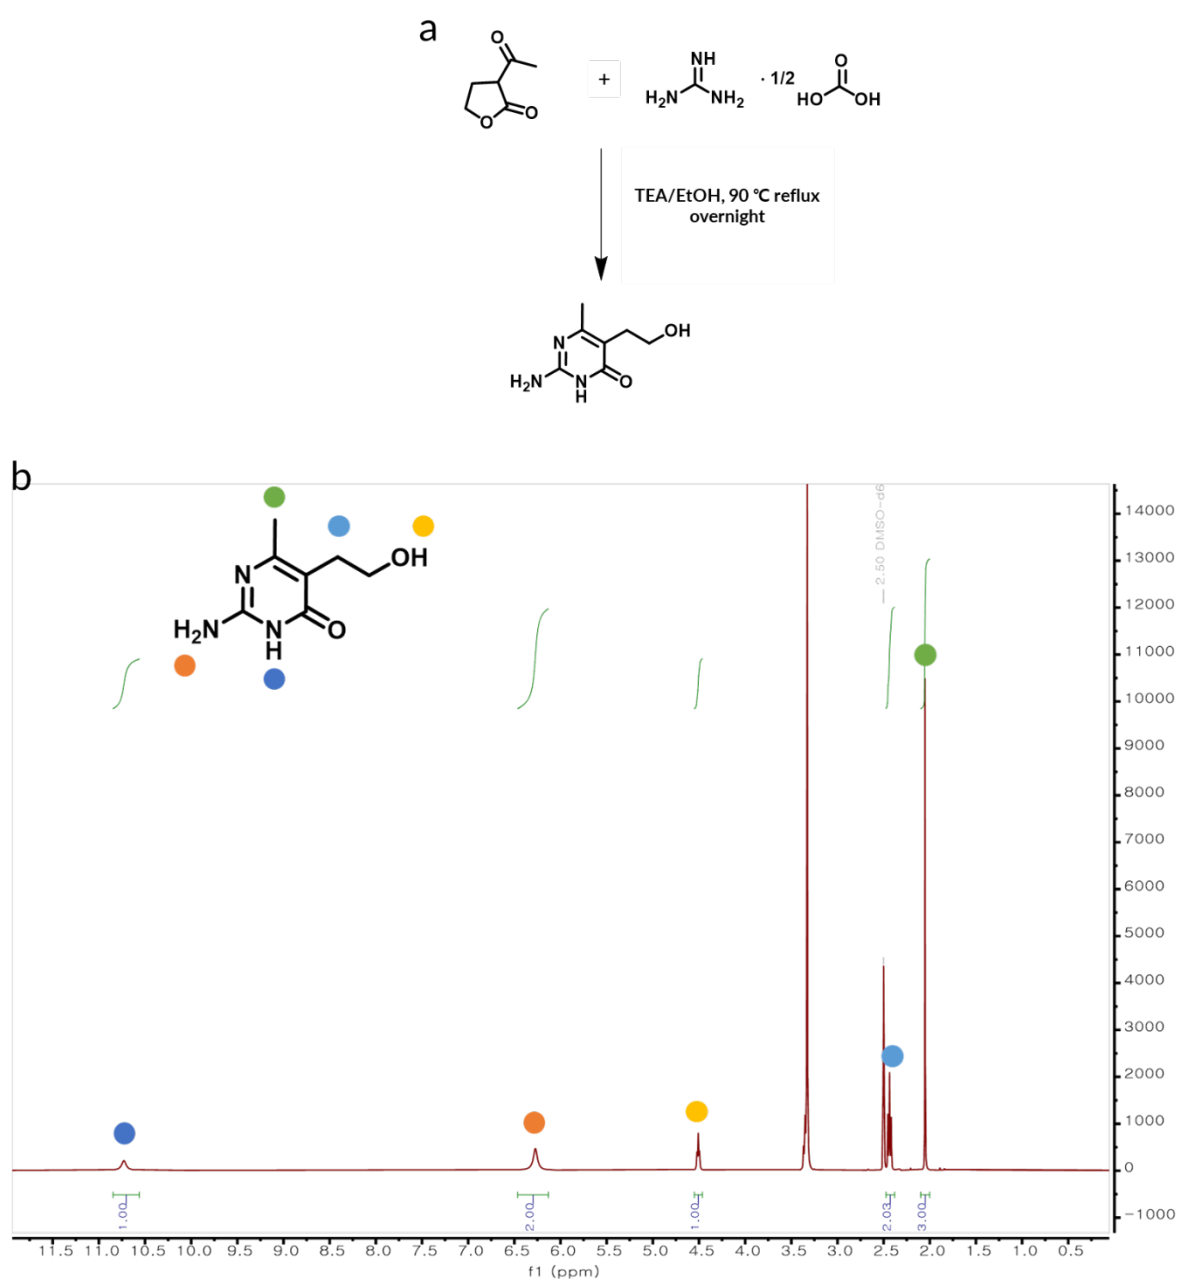

### Supplementary Figure 5. Synthesis of UPy.

**a**, Synthetic route to UPy. **b**,  $^1\text{H}$  NMR spectrum of UPy in DMSO (400 MHz):  $\delta$  2.02 (s, 3 H, 4-CH<sub>3</sub>), 2.43 (t, 2 H, J), 3.30 (t, 2 H, J), 4.51 (s, 1 H, OH, exch), 6.30 (s, 2 H, 2-NH<sub>2</sub>, exch), 10.75 (s, 1 H, 3-NH, exch).



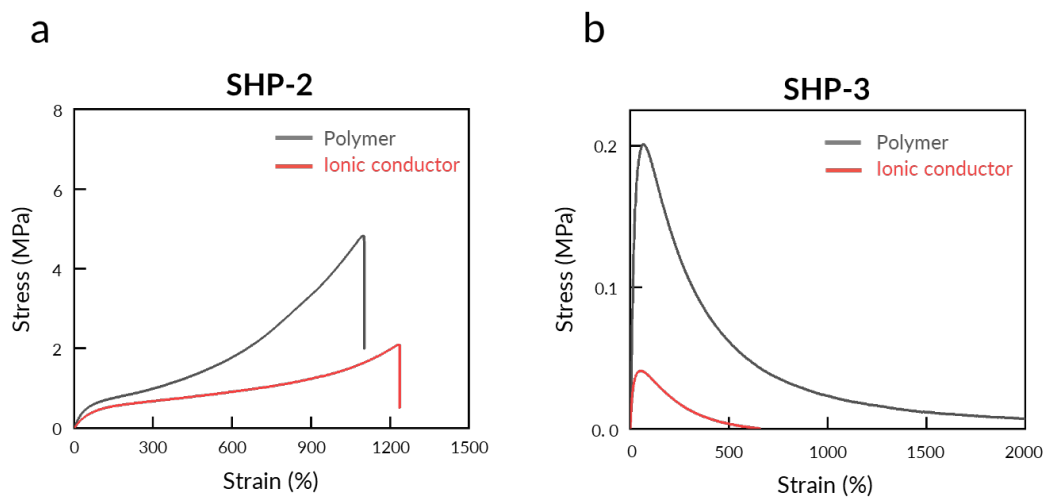

**Supplementary Figure 6. Comparison of polymer and ionic conductor in S-S curve.**

**a**, Comparison of SHP-2 and SHIC-2 in S-S curve. **b**, Comparison of SHP-3 and SHIC-3 in S-S curve. When ionic liquid was put into SHP, mechanical property of ionic conductor with more ratio of UPy was decreased less.

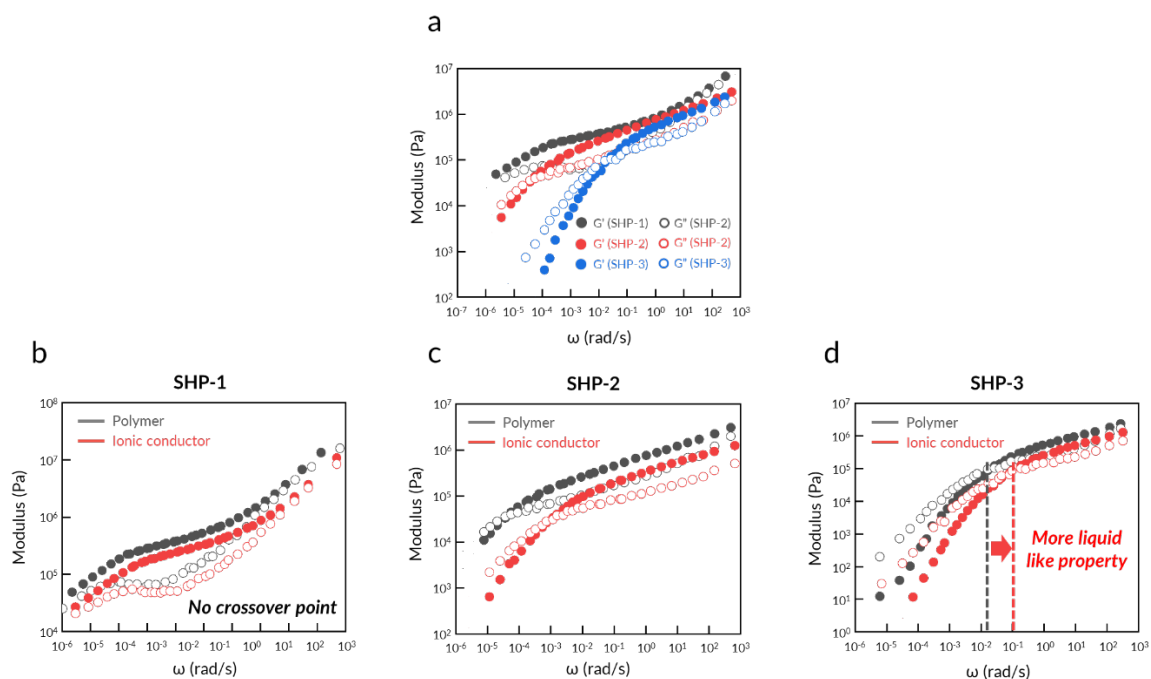

**Supplementary Figure 7. Master curves of self-healing materials.**

**a**, Mater curves of self-healing polymers. As the UPy content of the polymer increase, crossover frequency is lower, indicating that polymers with more UPy contents have more solid-like properties. **b-d**, Master curves of polymer and ionic conductor.

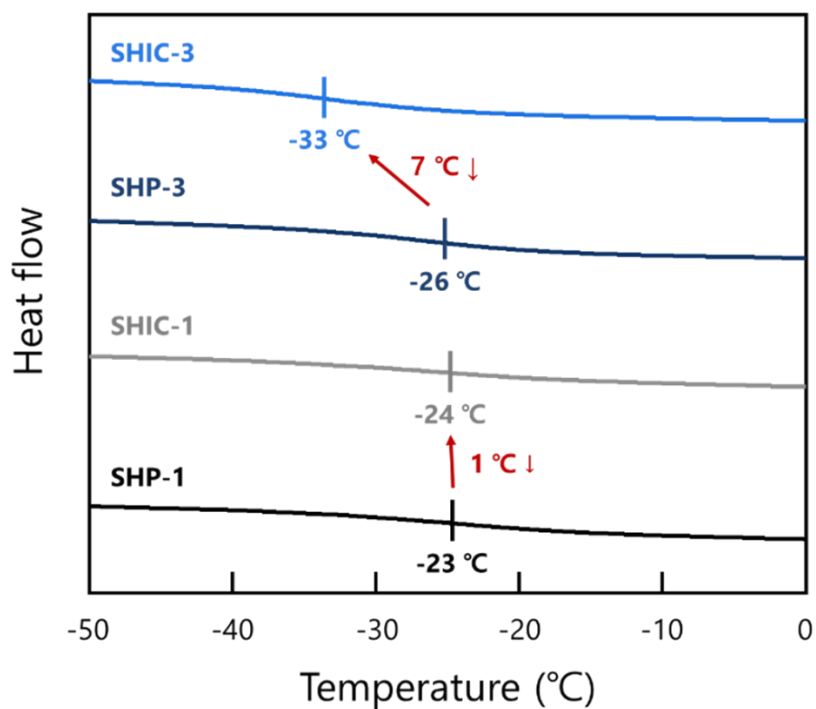

**Supplementary Figure 8. DSC data of self-healing materials.**

In the case of SHP-1 containing UPy moiety, the addition of ionic liquid does not significantly affect the chain mobility, resulting in little to no change in the glass transition temperature ( $T_g$ ). In contrast, for SHP-3 lacking the UPy moiety, the addition of ionic liquid disrupts the inter-chain interactions, thereby increasing chain mobility and leading to a decrease in the  $T_g$  value.

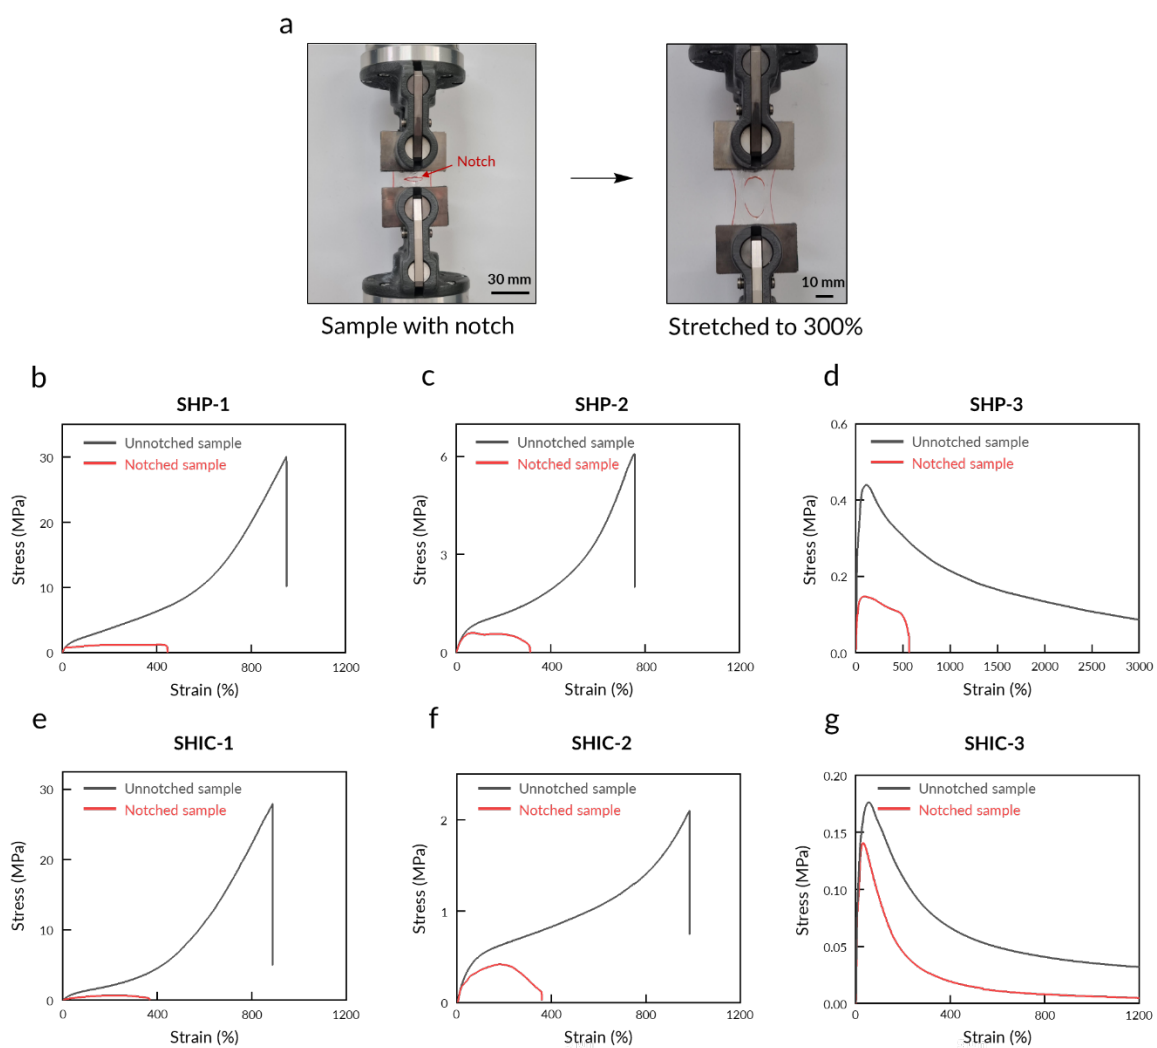

**Supplementary Figure 9. Fracture tests of self-healing materials.**

**a**, A notched SHIC-1 film before stretching (left) and after 300% stretching (right) in an Instron machine showing that the film is resistant to notch. **b-d**, Stress-extension curves of the unnotched and notched SHP. **e-g**, Stress-extension curves of the unnotched and notched SHIC.

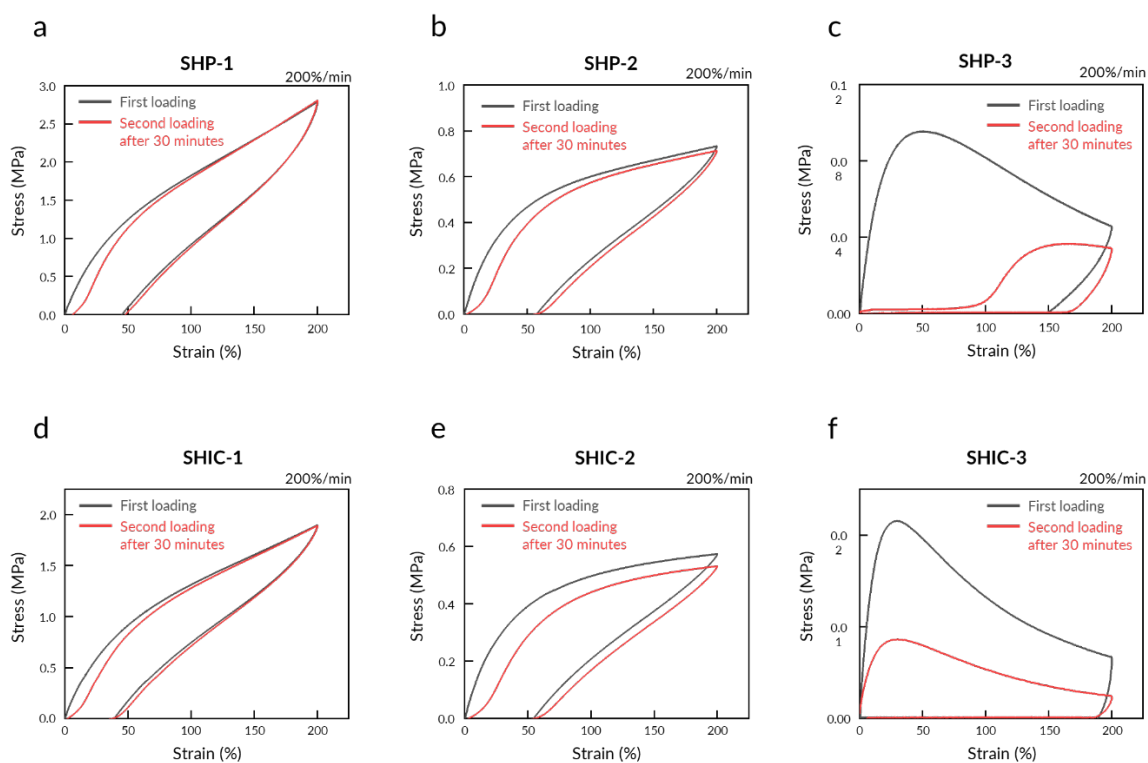

**Supplementary Figure 10. Stress-strain curves of self-healing materials.**

**a-c,** Cyclic stress-strain curves (up to 200% strain) of self-healing polymers at first loading (black) and second loading (red) after 30 minutes rest. SHP-1 and SHP-2 showed complete recovery thanks to strong H-bonding of UPy. SHP-3 which only have aromatic disulfide couldn't be recovered. **d-f,** Cyclic stress-strain curves (up to 200% strain) of self-healing polymers at first loading (black) and second loading (red) after 30 minutes rests. Only SHIC-1 showed complete recovery, because ionic liquid couldn't penetrate quadruple H-bonding.

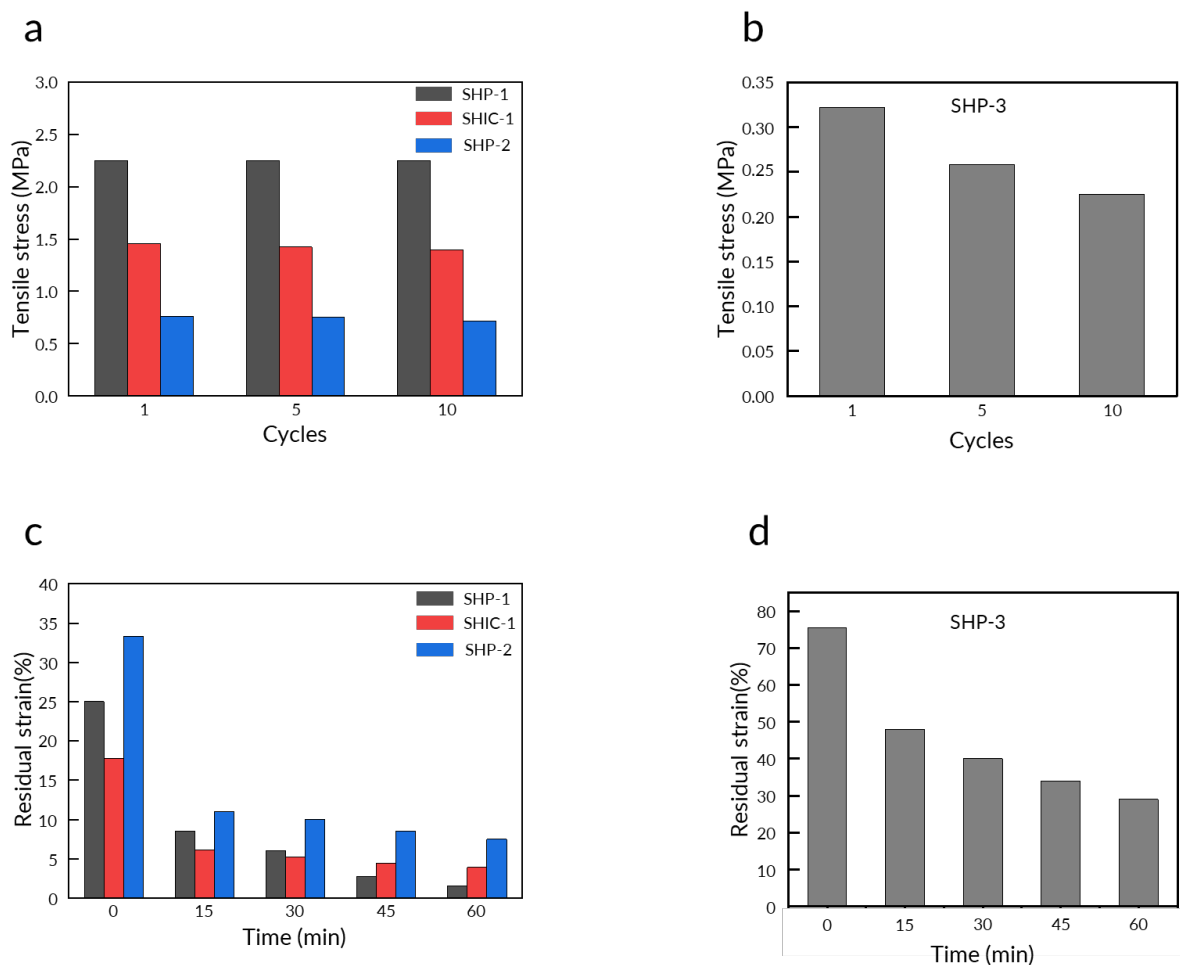

**Supplementary Figure 11. Cyclic Tests of self-healing materials.**

**a**, Tensile stress of self-healing materials at 100% strain with multiple cycles at 1000%/min with 15 minutes resting in between. Self-healing materials for robust self-healing robot were completely recovered. **b**, Tensile stress of SHP-3 at 100% strain with multiple cycles at 1000%/min with 15 minutes resting in between. SHP-3 which doesn't have UPy unit shows decrease of tensile stress indicating that UPy units impart the mechanical property. **c**, Residual strain measured by instron after 200% strain (holding time under strain: 0 h) with varying resting time. Self-healing materials for robust self-healing almost returned to its original state indicating the materials are elastic. **d**, Residual strain of SHP-3 measured by INSTRON after 200% strain (holding time under strain: 0 h) with varying resting time. SHP-3 doesn't return to its original state indicating that SHP-3 isn't elastic.

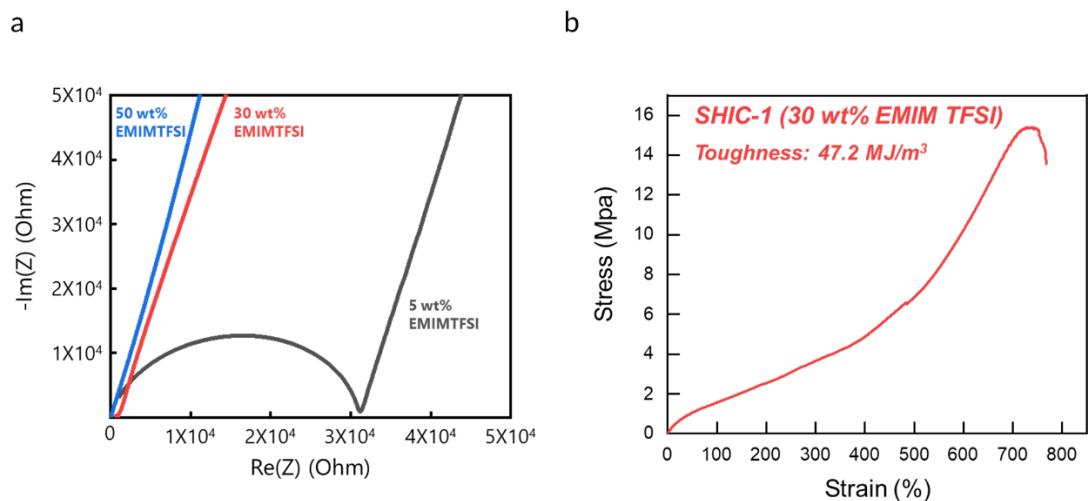

**Supplementary Figure 12. Nyquist plot for SHIC-1 as a function of the amount of ionic liquid and the stress-strain curve (S-S curve) for SHIC-1 with 30 wt% EMIMTFSI.**

**a,** The ionic conductivity value increased with the amount of added ionic liquid. SHIC with 5 wt% EMIMTFSI:  $3.04 \times 10^{-6} \text{ S/cm}$ , SHIC with 30 wt% EMIMTFSI:  $2.30 \times 10^{-4} \text{ S/cm}$ , SHIC with 50 wt% EMIMTFSI:  $3.20 \times 10^{-3} \text{ S/cm}$ . **b,** SHIC with 30 wt% EMIMTFSI show tough mechanical property.

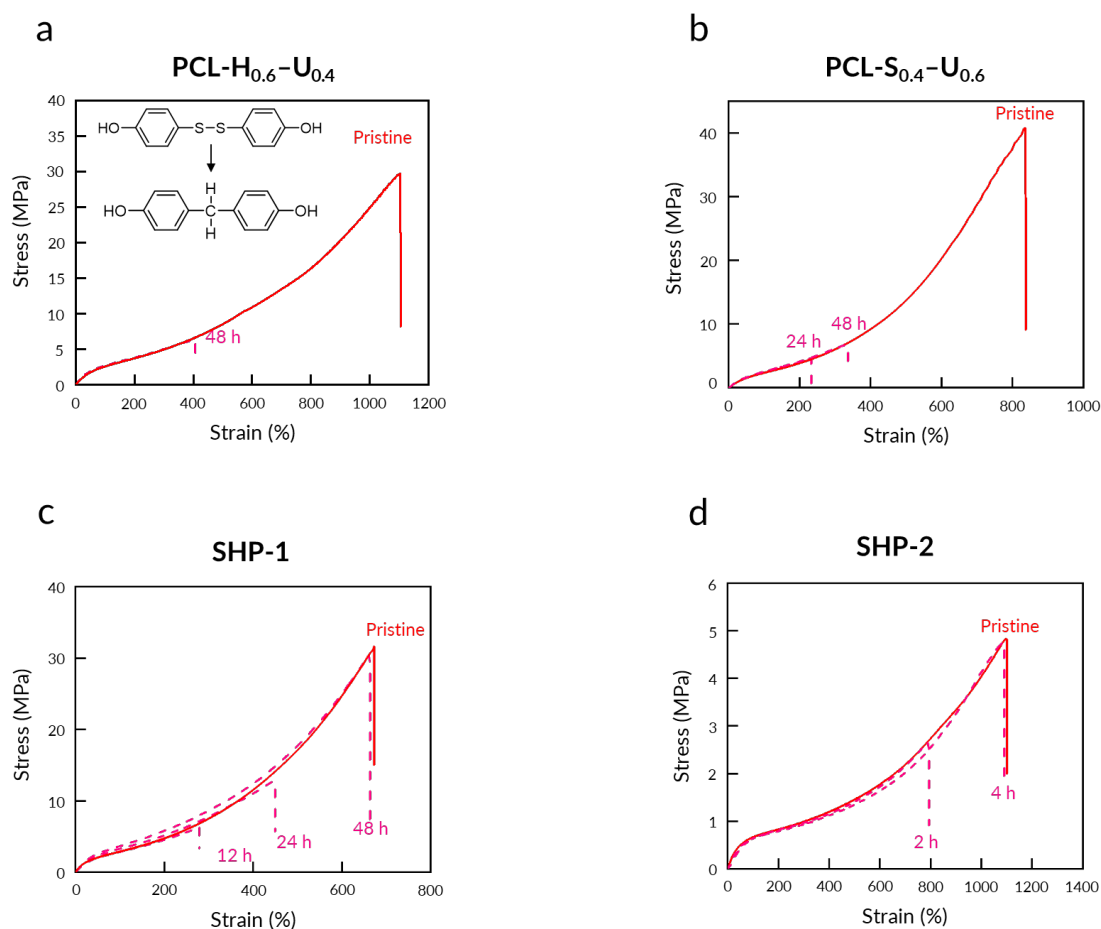

### Supplementary Figure 13. Self-healing tests of materials.

Self-healing dog bone was cut into two pieces and then put any two pieces into contact. **a**, When 4,4'-dihydroxydiphenylmethane was used instead of bis(4-hydroxyphenyl) disulfide, the polymer was self-healed only 35% after 48 hours, indicating that disulfide imparts the self-healing properties of SHPs. **b**, PCL-S<sub>0.4</sub>-U<sub>0.6</sub> was self-healed only 30% because strong because of restricted chain mobility for self-healing. **c**, However, appropriate ratio of aromatic disulfide and UPy made complete self-healing. **d**, And SHP-2, which had a higher ratio of disulfide, was self-healed in a faster time.



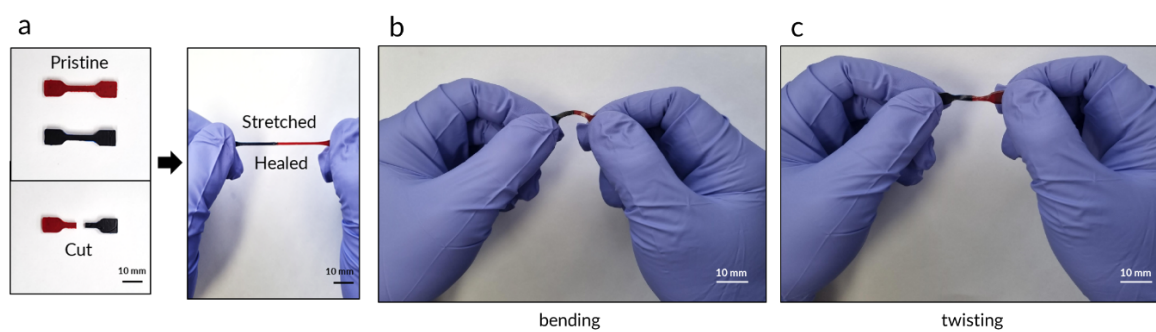

**Supplementary Figure 14. Self-healing tests of SHIC-1.**

**a**, Dumbbell sample was bisected to two pieces and put together for self-healing. After some time, the jointed sample can be stretched, **b**, Bent and **c**, Twisted.

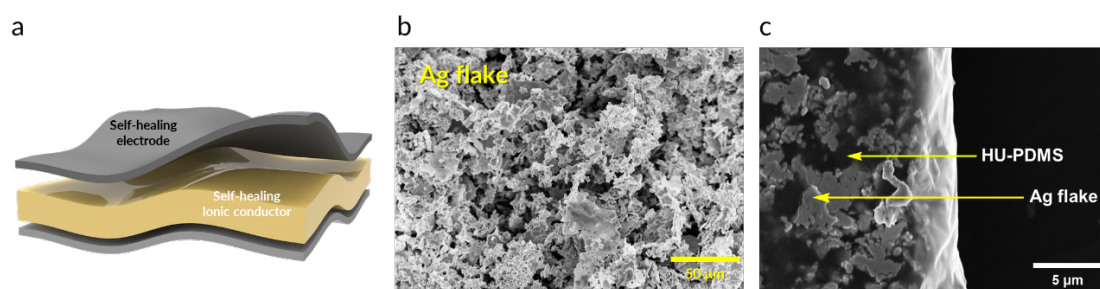

**Supplementary Figure 15. Self-healing stretchable multimodal sensor and electrodes.**

**a**, Schematic illustration of self-healing stretchable multimodal sensor. **b**, Scanning Electron Microscope (SEM) image of Ag flake. **c**, Scanning Electron Microscope (SEM) image of self-healing stretchable electrode.

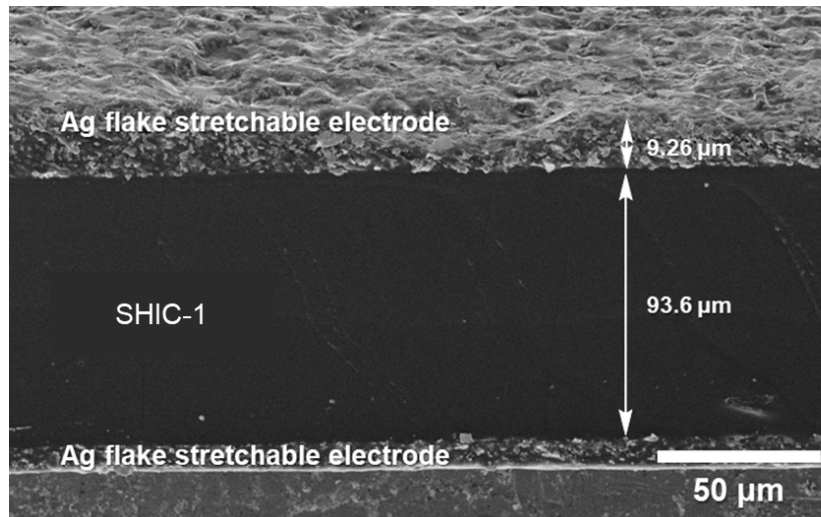

**Supplementary Figure 16. SEM image of self-healing artificial multimodal sensor.**

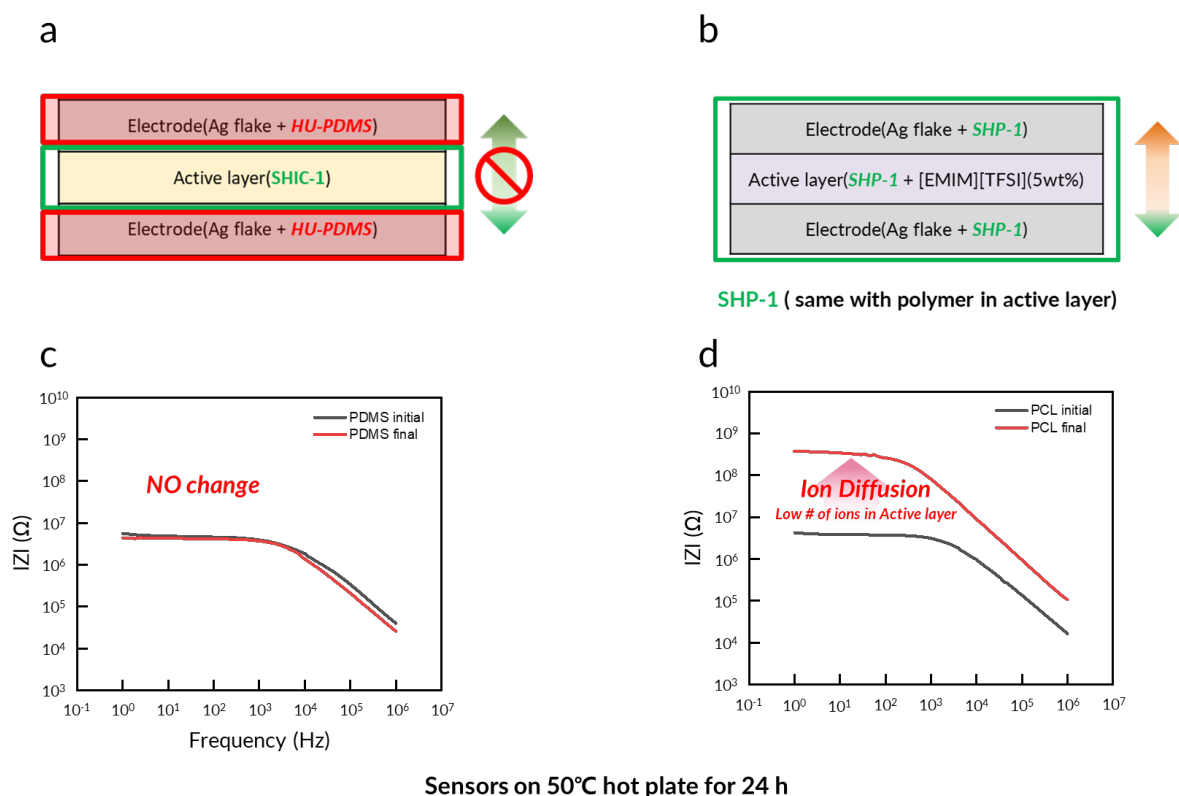

**Supplementary Figure 17. A comparison between self-healing artificial multimodal sensors with different active layers.**

**a**, Schematic illustration of self-healing multimodal sensor with electrodes composed of HU-PDMS and Ag. **b**, Schematic illustration of self-healing multimodal sensor with electrodes composed of SHP-1 and Ag. **c**, Because HU-PDMS was hydrophobic while PCL was hydrophilic, there was no significant change of impedance, after the sensors had been on 50 °C hot plate for 24 h. **d**, However, the recetor consisting of same polymer (PCL) showed dramatic change of impedance after the same process. So, the HU-PDMS with Ag flake was chosen for self-healing stretchable electrodes.

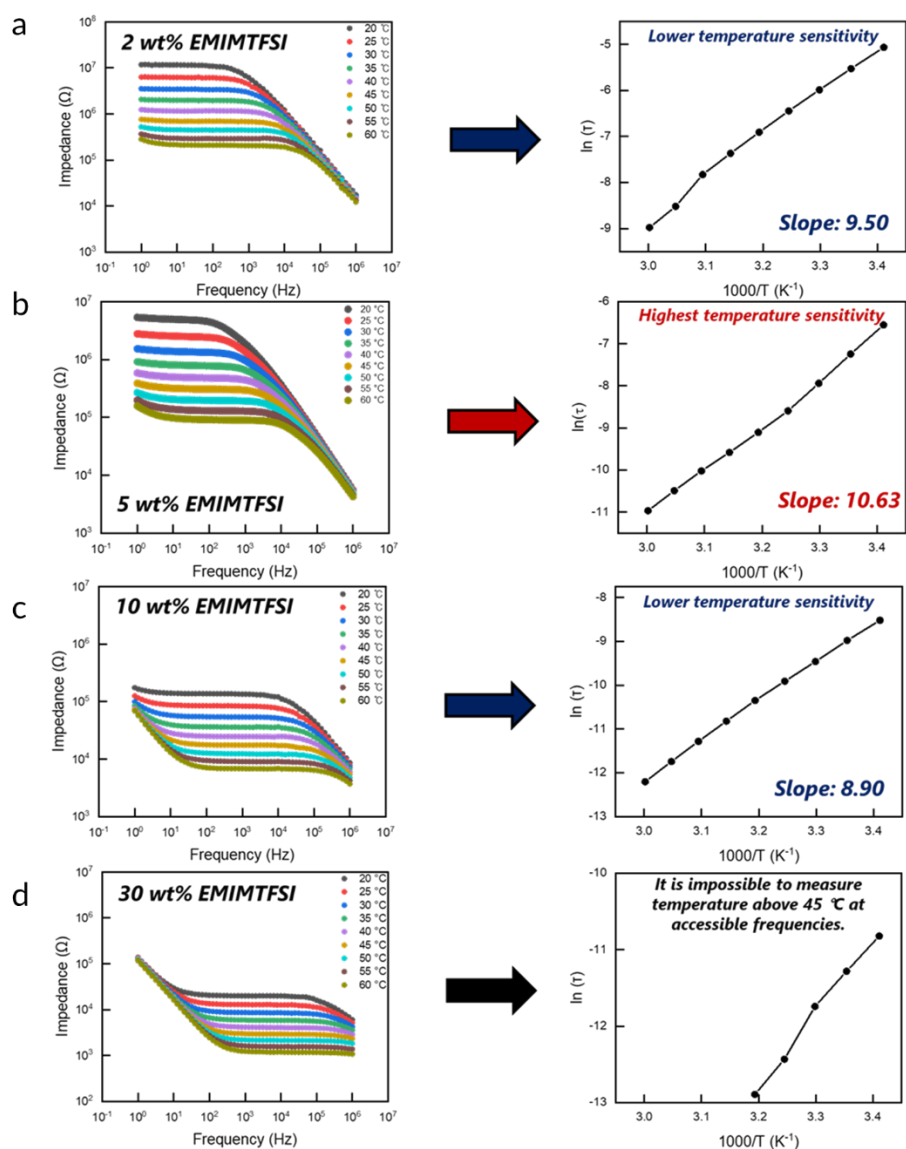

**Supplementary Figure 18. Comparison of the temperature sensitivity of the multimodal sensor based on the amount of EMIMTFSI in the SHIC-1 active layer.**

**a**, Bode plot for the multimodal sensor of SHIC-1 with 2 wt% EMIMTFSI used as the active layer. **b**, Bode plot for the multimodal sensor of SHIC-1 with 5 wt% EMIMTFSI used as the active layer. **c**, Bode plot for the multimodal sensor of SHIC-1 with 10 wt% EMIMTFSI used as the active layer. **d**, Bode plot for the multimodal sensor of SHIC-1 with 30 wt% EMIMTFSI used as the active layer.

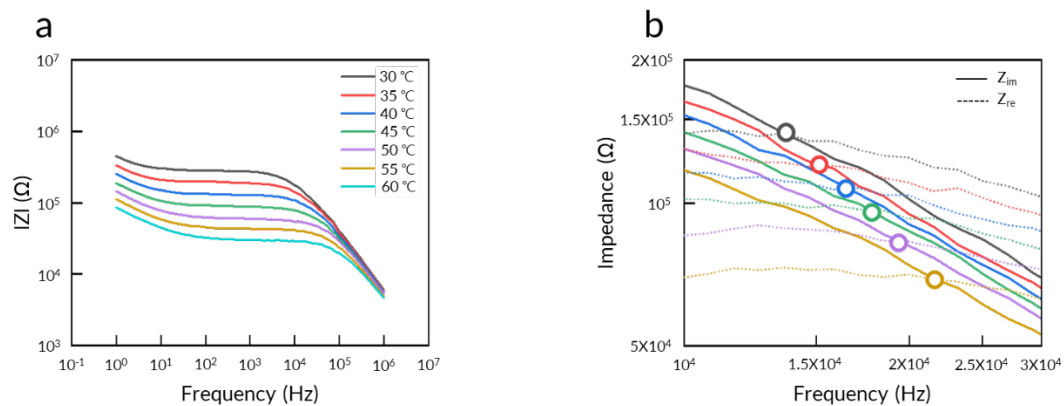

**Supplementary Figure 19. Charge relaxation frequency behavior under different temperatures.**

**a,** Bode plots with different temperatures. **b,** Charge relaxation frequency was depending on temperature.

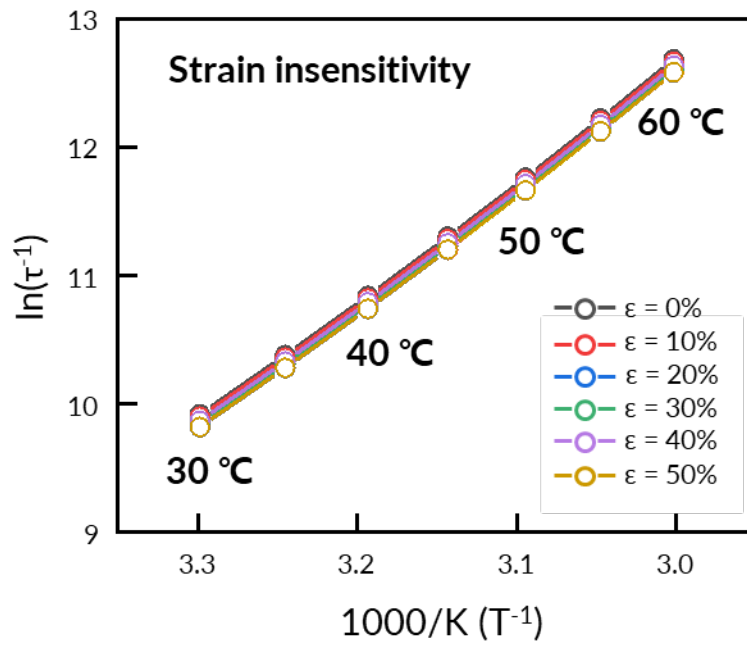

**Supplementary Figure 20. Strain-insensitive temperature sensing under various temperature and strain.**

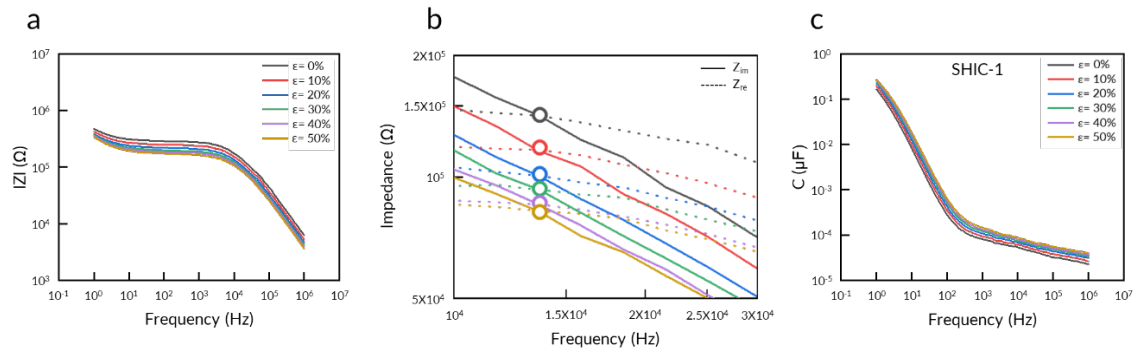

**Supplementary Figure 21. Charge relaxation frequency and capacitance behavior under stretching.**

**a,** Bode plots with different strains. **b,** Charge relaxation frequency showed constant values regardless of temperature, because charge relaxation frequency is an intrinsic variable. **c,** Capacitance in the same frequency changed according to strain, because the capacitance is an extrinsic variable that is sensitive to dimensional changes.



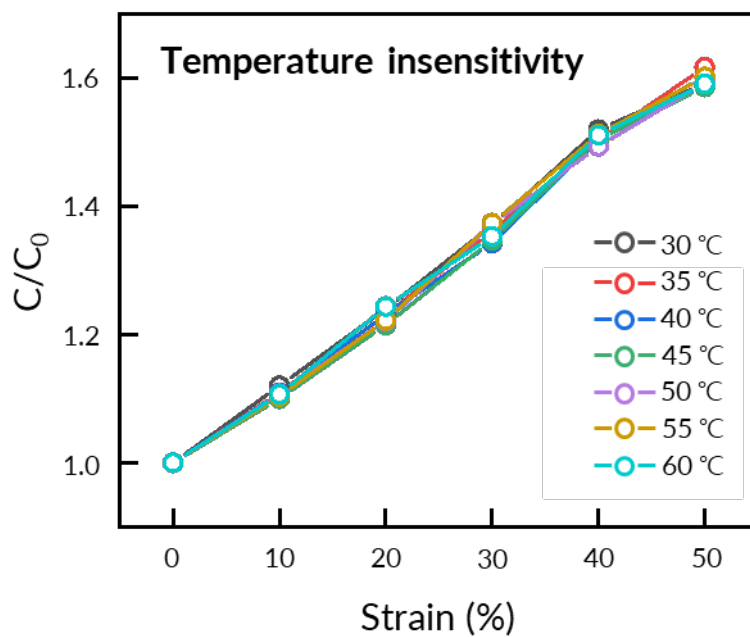

**Supplementary Figure 22. Temperature-insensitive strain sensing under various temperatures and strains.**

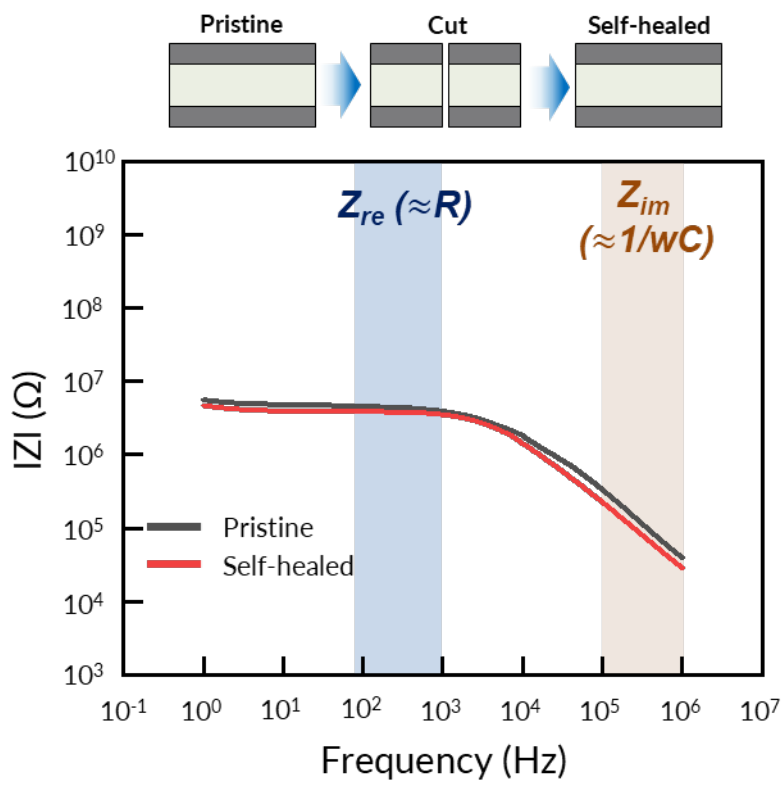

**Supplementary Figure 23. Comparison of bode plots between pristine multimodal sensor and self-healed multimodal sensor.**

a

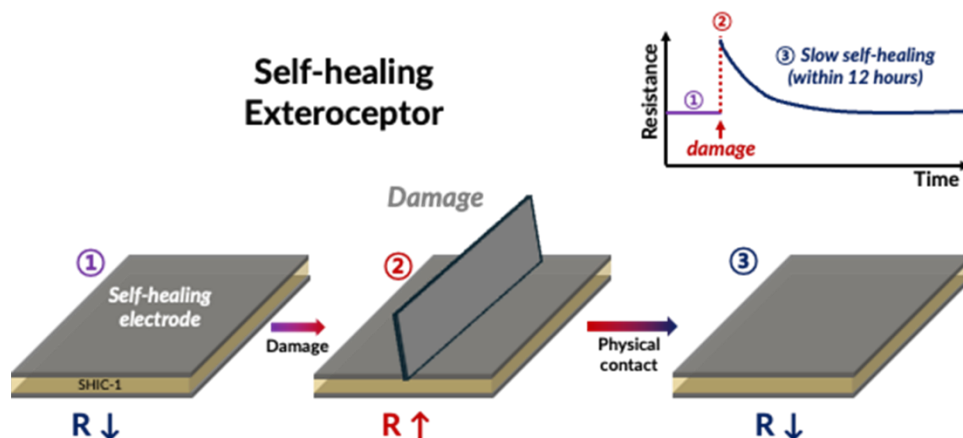

b

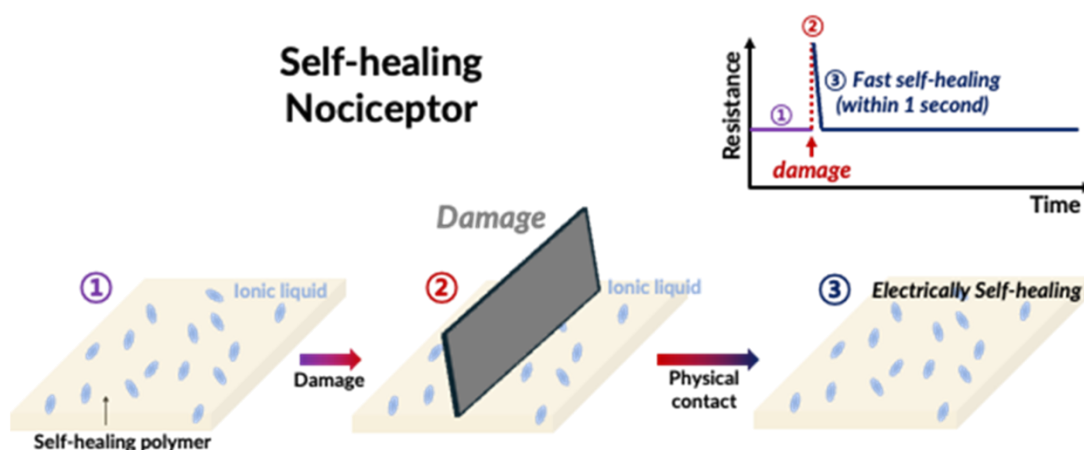

**Supplementary Figure 24. Difference in self-healing speed between the self-healing multimodal sensor and the self-healing damage sensor.**

**a**, In the case of the self-healing multimodal sensor, both the electrode and the active layer (SHIC with 5 wt% EMIMTFSI) need to undergo self-healing, resulting in a longer time for electrical self-healing. **b**, In contrast, the self-healing damage sensor, composed solely of SHIC-1, achieves self-healing more easily through physical contact. Additionally, due to the high concentration of ionic liquid (30 wt% EMIMTFSI), the self-healing speed is significantly faster.

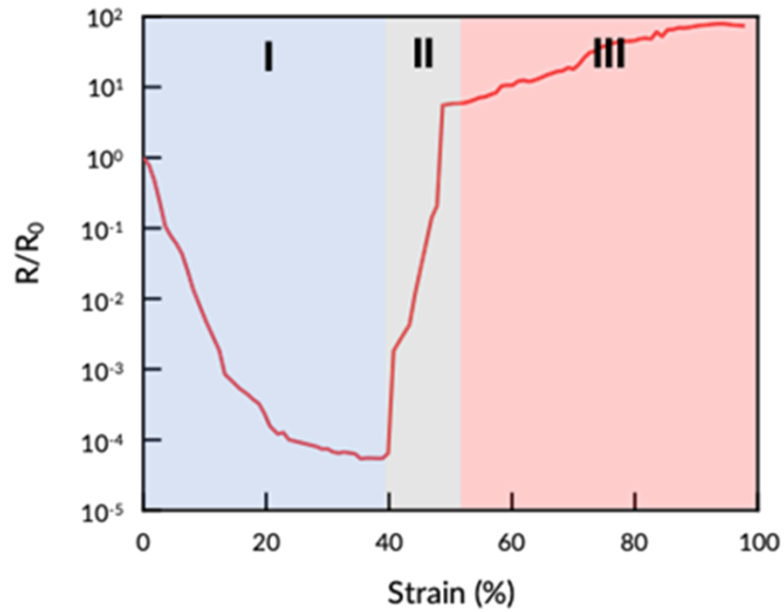

**Supplementary Figure 25. Changes of resistance of flexion sensor as a function of strain.**

At low levels of strain, micro-Ni particles of the flexion sensor form a conductive network, leading to a sharp decrease in resistance (I). Then, beyond a certain threshold of strain, the conductive network is disrupted, resulting in a rapid increase in resistance (II), ultimately a high resistance value (III). Consequently, when a soft gripper is actuated, a small strain is applied to the flexion sensor, causing a dramatic decrease in resistance.

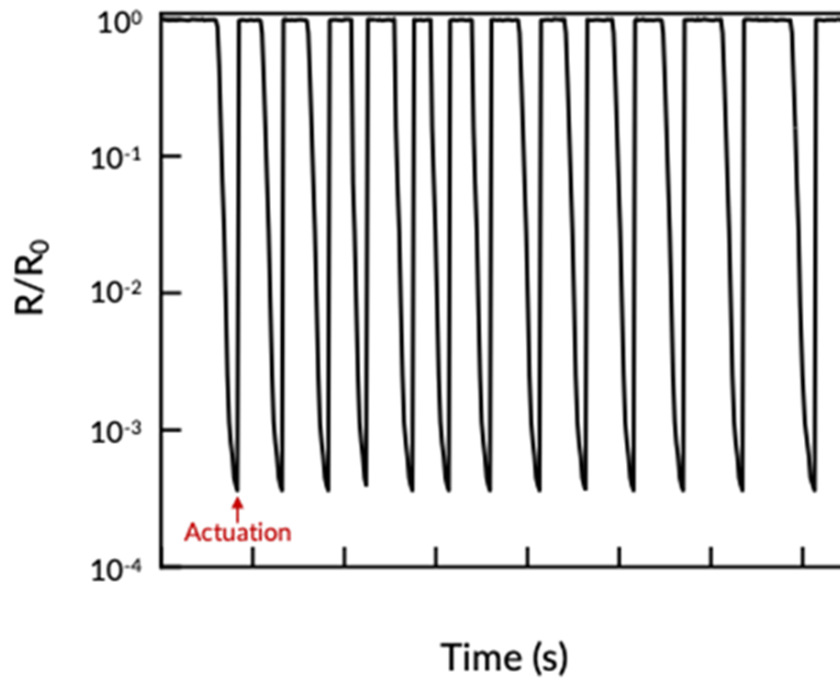

**Supplementary Figure 26. Cyclic test of the flexion sensor.**

It was confirmed that the flexion sensor exhibited consistent resistance changes when the soft gripper was actuated repeatedly.

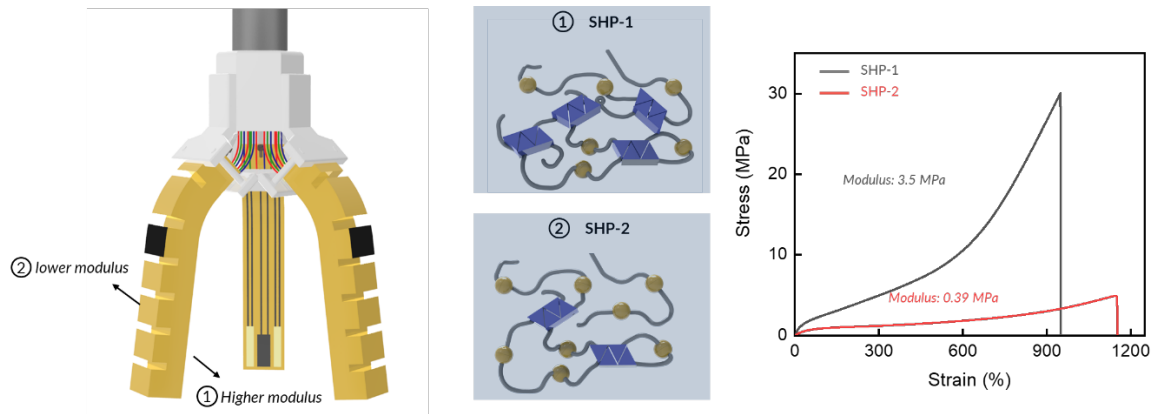

**Supplementary Figure 27. The configuration of soft grippers.**

For the soft gripper to function effectively under pneumatic pressure, there must be a modulus difference between the extensible layer and the inextensible layer. Therefore, SHP-2 with a low modulus was used for the extensible layer, while SHP-1 with a high modulus was used for the inextensible layer.

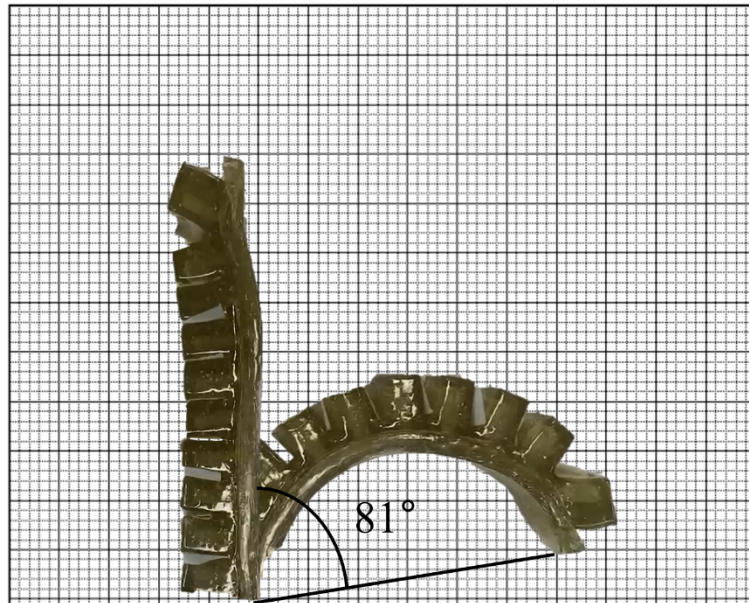

**Supplementary Figure 28. Actuation ability of the self-healing gripper.**

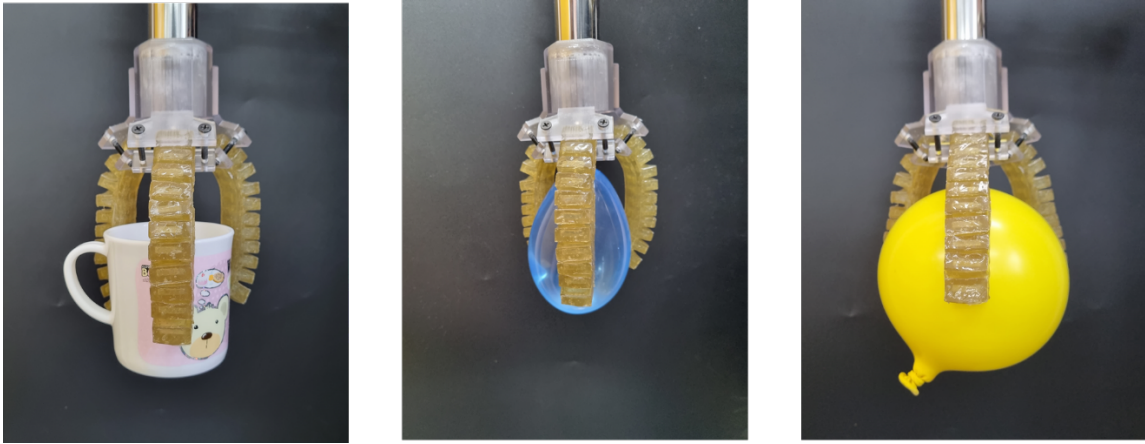

**Supplementary Figure 29. Bending soft pneumatic actuator for soft gripper applications.**



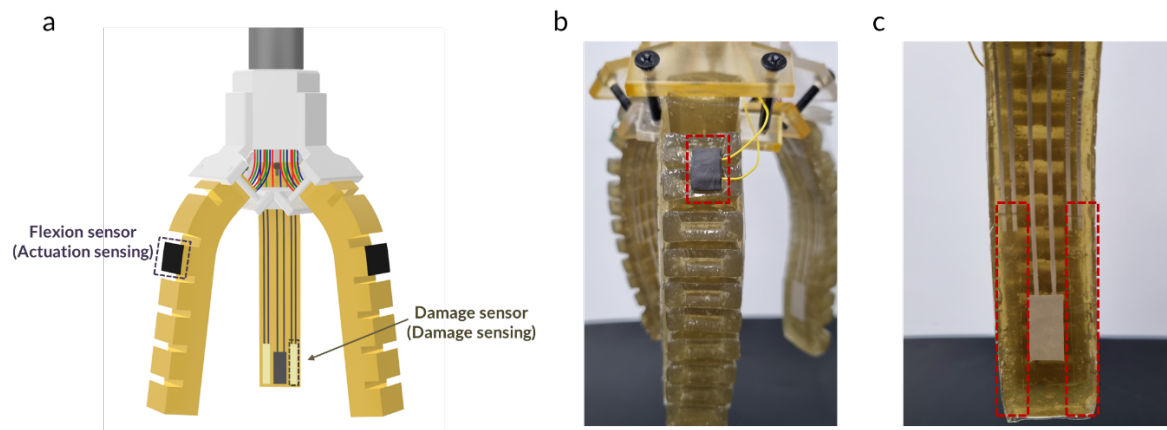

**Supplementary Figure 30. Self-healing stretchable flexion sensor and damage sensor.**

**a**, Schematic illustration of self-healing soft robots with flexion sensor and damage sensor. **b**, The photo of the flexion sensor. **c**, The photo of the damage sensor.

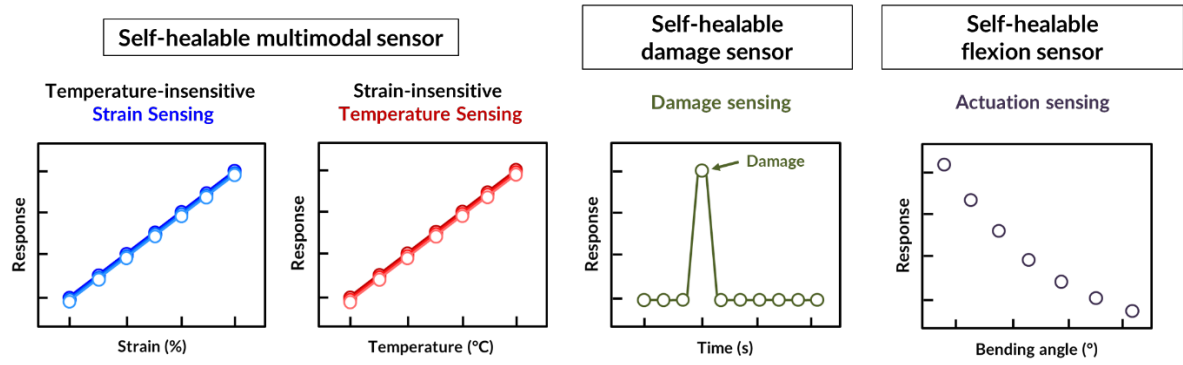

**Supplementary Figure 31. Sensory systems of the soft robot.**

Sensory systems are composed of self-healable multimodal sensor for tactile sensing, self-healable damage sensor for damage sensing, and self-healable flexion sensor for actuation sensing.

a

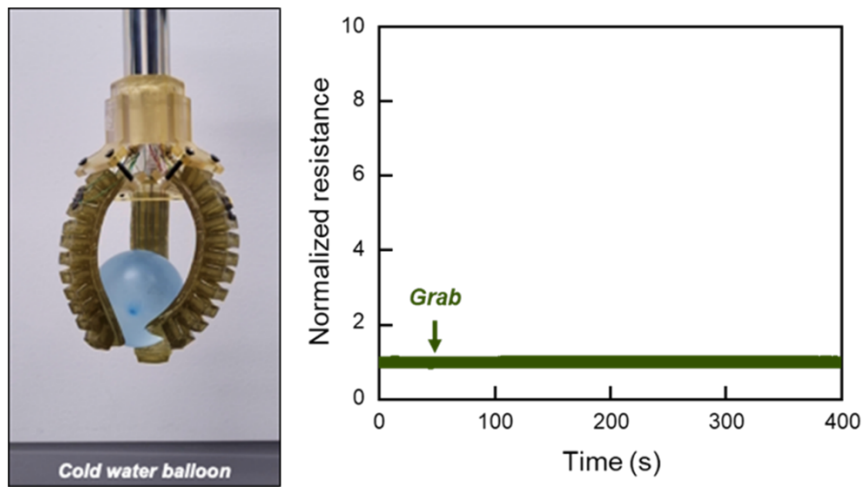

b

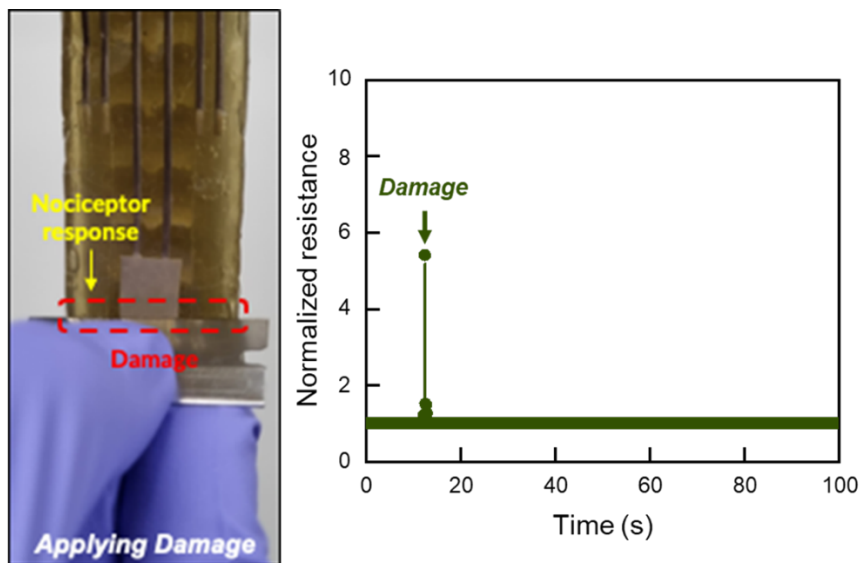

**Supplementary Figure 32. Difference in resistance change of the self-healing damage sensor when grabbing an object versus when damage is inflicted.**

**a**, When performing the action of grabbing an object, the resistance of the damage sensor remains almost unchanged. **b**, In contrast, when damage is inflicted, a significant resistance peak is observed. This experiment confirms that the damage sensor is responsive exclusively to damage.

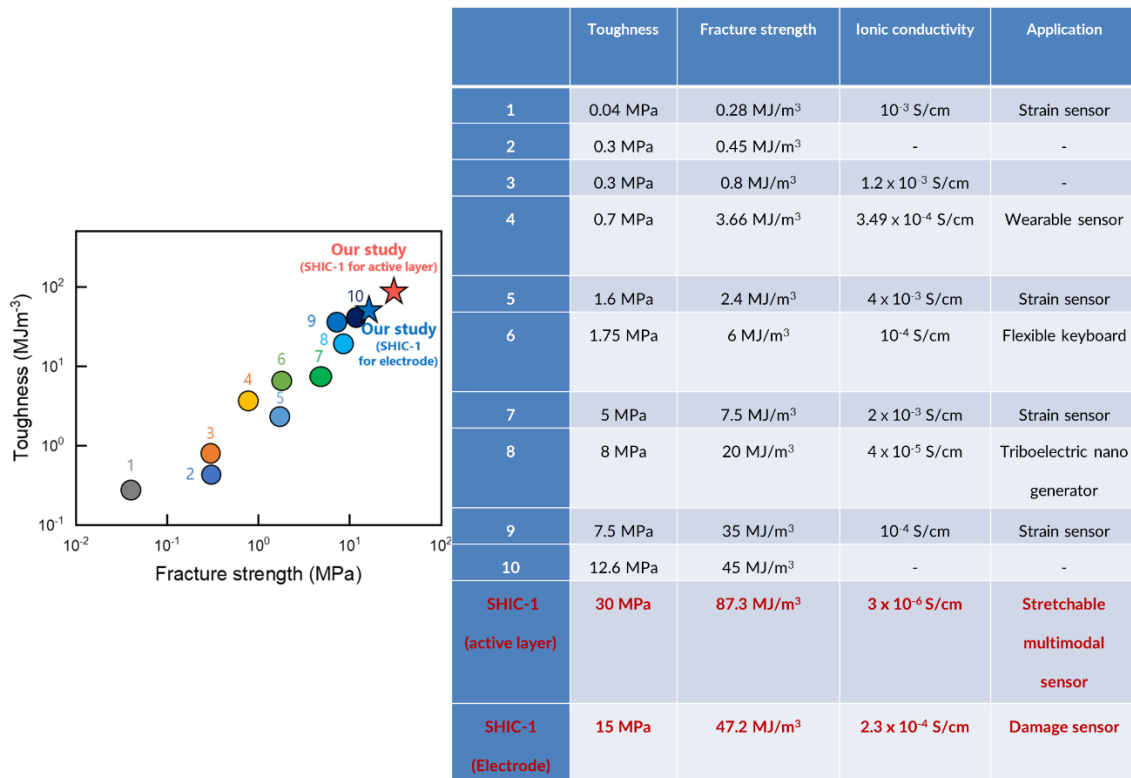

| #  | References                                                                                                                                                                                                                                                                   |
|----|------------------------------------------------------------------------------------------------------------------------------------------------------------------------------------------------------------------------------------------------------------------------------|
| 1  | Zhang, L. et al. Self-Healing, Adhesive, and Highly Stretchable Ionogel as a Strain Sensor for Extremely Large Deformation. <i>Small</i> . <b>15</b> , 1804651 (2019).                                                                                                       |
| 2  | Kaimo, E., Yasui, T., Iida, Y., Gong, J. & Matsuyama, H. Inorganic / Organic Double-Network Gels Containing Ionic Liquids. <i>Adv. Mater.</i> <b>29</b> , 1704118 (2017).                                                                                                    |
| 3  | Tamate, R. et al. Self-Healing Micellar Ion Gels Based on Multiple Hydrogen Bonding. <i>Adv. Mater.</i> <b>30</b> , 1802792 (2018).                                                                                                                                          |
| 4  | Xu, L. et al. A transparent, Highly Stretchable, Solvent-Resistant, Recyclable Multifunctional Ionogel with Underwater Self-healing and Adhesion for Reliable Strain Sensors. <i>Adv. Mater.</i> <b>33</b> , 2105306 (2021).                                                 |
| 5  | Xu, J., Wang, H., Du, X., Cheng, X., Du, Z. & Wang, H. Self-healing, anti-freezing and highly stretchable polyurethane ionogel as ionic skin for wireless strain sensing. <i>Chemical Engineering Journal</i> . <b>426</b> , 130724 (2021).                                  |
| 6  | Yang, L. et al. Mechanically Robust and Room Temperature Self-healing Ionogel Based on Ionic Liquid Inhibited Reversible Reaction of Disulfide Bonds. <i>Adv. Sci.</i> <b>10</b> , 2207527 (2023).                                                                           |
| 7  | Xu, J., Wang, H., Wen, X., Wang, S. & Wang, H. Mechanically Strong, Wet Adhesive, and Self-Healing Polyurethane Ionogel Enhanced with a Semi-interpenetrating Network for Underwater Motion Detection. <i>ACS. Appl. Mater. Interfaces</i> . <b>14</b> , 54203-54214 (2022). |
| 8  | Li, H., Xu, F., Guan, T., Li, Y. & Sun, J. Mechanically and environmentally stable triboelectric nanogenerator based on high-strength and anti-compression self-healing ionogel. <i>Nano Energy</i> . <b>90</b> , 106645 (2021).                                             |
| 9  | Zhang, M. et al. Self-healing, mechanically robust, 3D printable ionogel for highly sensitive and long-term reliable ionotronics. <i>J. Mater. Chem. A</i> . <b>10</b> , 12005-12015 (2022).                                                                                 |
| 10 | Wang, M et al. Tough and stretchable ionogels by in situ phase separation. <i>Nat. Mater.</i> <b>21</b> , 359-365 (2022).                                                                                                                                                    |

**Supplementary Table 1. Comparison of the ionic conductivity and mechanical toughness of ionic conductors mentioned in the references.**
