# Supplementary material for: Self-healing electronic skin with high fracture strength and toughness
Source: PubMed Central journal article supplement — Nat Commun. 2024 Nov 11;15:9763. doi: 10.1038/s41467-024-53957-0 (PMC11554781; doi:10.1038/s41467-024-53957-0), 2024-11-11
Supplement: 41467_2024_53957_MOESM3_ESM.pdf [file 41467_2024_53957_MOESM3_ESM.pdf]

## Description of Additional Supplementary Files

**Supplementary Movie 1:** Change of Z when grabbing a cool waterballoon. (Exteroceptor)

**Supplementary Movie 2:** Change of Z when grabbing a warm RBF. (Exteroceptor)

**Supplementary Movie 3:** Change of Z when grabbing a warm RBF. (Proprioceptor)
